# Supplementary material for: Atrogin-1 deficiency promotes cardiomyopathy and premature death via impaired autophagy
Source: JCI journal article supplement (doi:10.1172/jci66339), 2014-05-01
Supplement: sd1 [file 1]

## SUPPLEMENTARY DATA

### **Ablation of Atrogin-1 impairs autophagy causing cardiomyopathy and premature death.**

Tania Zaglia <sup>\*1,2</sup>, Giulia Milan <sup>\*2</sup>, Aaron Ruhs <sup>4</sup>, Mauro Franzoso <sup>1,2</sup>, Enrico Bertaglia <sup>1,2</sup>, Nicola Pianca <sup>1,2</sup>, Andrea Carpi <sup>5</sup>, Pierluigi Carullo <sup>6</sup>, Paola Pesce <sup>7</sup>, David Sacerdoti <sup>7</sup>, Cristiano Sarais <sup>8</sup>, Daniele Catalucci <sup>5</sup>, Marcus Krüger <sup>4</sup>, Marco Mongillo <sup>§ 1,2,3</sup> and Marco Sandri <sup>§ 1,2,3,9</sup>

<sup>1</sup>*Department of Biomedical Sciences, University of Padova, Viale G. Colombo 3, 35121 Padova, Italy.*

<sup>2</sup>*Venetian Institute of Molecular Medicine (VIMM), Via Orus 2, 35129 Padova, Italy.* <sup>3</sup> *CNR Institute of Neuroscience, Viale G. Colombo 3, 35121 Padova, Italy.* <sup>4</sup> *Max Planck Institute for Heart and Lung Research, Ludwigstrasse 43, 61231 Bad Nauheim, Germany.* <sup>5</sup> *European Institute of Oncology (IEO), Via Adamello 16, 20139 Milano, Italy.* <sup>6</sup> *National Research Council (CNR), Institute of Genetic and Biomedical Research (IRGB) - UOS of Milan, Milan, Italy and Humanitas Clinical and Research Center, via Manzoni 113, 20089 Rozzano (Milan), Italy.* <sup>7</sup> *Department of Clinical and Experimental Medicine, University of Padova, Via Giustiniani 2, 35128 Padova, Italy.* <sup>8</sup> *Department of Cardiac, Thoracic and Vascular Sciences, University of Padova, Via Giustiniani 2, 35128 Padua, Italy.* <sup>9</sup> *Telethon Institute of Genetics and Medicine (TIGEM), via P. Castellino 111, 80131 Napoli, Italy.*

\* and § : equal contributors

Address correspondence to: Marco Sandri, Venetian Institute of Molecular Medicine, via Orus 2, 35129 Padova, Italy. Phone: +390497923250; Fax: +390497923xx, E-mail: [marco.sandri@unipd.it](mailto:marco.sandri@unipd.it);

Marco Mongillo, Venetian Institute of Molecular Medicine, via Orus 2, 35129 Padova, Italy. Phone: +390497923229; Fax: +390497923250, E-mail: [marco.mongillo@unipd.it](mailto:marco.mongillo@unipd.it)

## **COMPETING FINANCIAL INTEREST**

The authors declare no conflicting financial interests.

## **Content:**

- Supplementary Methods;**
- Supplementary Figures 1-7;**
- Supplementary Tables (1-5);**
- Supplementary Figure Legends;**

## **Supplementary Methods**

**Western blotting.** Myocardial protein extracts were obtained from adult and aged control and Atrogin-1 KO mice as previously described (1) and protein concentration was determined by BCA assay (Pierce, Milan, Italy). Both SDS-page with Coomassie Blue and Western blotting incubation with  $\beta$ -tubulin were used to ensure accurate protein titration. SDS-PAGE was performed either on 3-8% or 4–12% gradient gels (Invitrogen, Milan, Italy) loading from 30 to 60  $\mu$ g protein/lane. Myocardial proteins, transferred onto PVDF (Invitrogen), were processed with primary antibodies listed in **Supplementary Table 4** either 1h at room temperature or over night at 4°C. The blots were then incubated with secondary antibodies conjugated to horseradish peroxidase (Biorad, Milan, Italy) and the reactivity was revealed by enhanced chemiluminescence (Pierce). Blots were stripped using Restore Western Blotting Stripping Reagent (Pierce) according to the manufacturer's instructions and re-probed if necessary. After performing WB with the antibodies used in this study, that was repeated in triplicate, blots were re-probed with beta-tubulin when applicable as loading control.

**Quantitative RT-PCR.** Total RNA was prepared using the SV Total RNA Isolation System (Promega Milan, Italy) according to the manufacturer's protocol and single-strand cDNA was synthesized by SuperScript III (Invitrogen). RT-qPCR was performed using a GeneAmp 9600 thermocycler, coupled with a GeneAmp 5700 Sequence Detection System (Applied Biosystems, Monza, Italy), according to the

manufacturer's instructions, with the SYBR Green I kit (QIAGEN, Milan, Italy). The relative quantification method, described by Pfaffl (2), was used to evaluate the differences in gene expression. Values in the experiments were normalized to the expression of the GAPDH internal reference, whose abundance did not change under the experimental conditions used in the study. Gene-specific primer pairs were selected with Primer 3 software ([http://frodo.wi.mit.edu/cgi-bin/primer3/primer3\\_www.cgi](http://frodo.wi.mit.edu/cgi-bin/primer3/primer3_www.cgi)); sequences of distinct exons were chosen to avoid amplifying contaminant genomic DNA. The primer sequences used in this study are listed in **Supplementary Table 5**. The results of RTqPCR are given in arbitrary units and expressed as fold changes in mRNA levels relative to controls.

**Mass spectrometry (MS)-based proteomics.** Mass spectrometry (MS)-based proteomics was performed in nine month old control and Atrogin-1 KO hearts. Following protein extraction from the heart tissue (buffer: 4% SDS, 100mM Tris/HCl pH 7.6, 0.1M DTT) samples were separated on NuPAGE 4-12 % BIS-TRIS gel (Invitrogen, Carlsbad, USA). Gels were stained with colloidal Protein Staining Solution (Invitrogen), and 12 evenly sized gel pieces were excised and processed for mass spectrometry. The gel pieces were subjected to in gel reduction and alkylation, followed by LysC digestion as described previously (3, 4). Briefly, gel pieces were washed twice with 50 % (50 mM  $\text{NH}_4\text{HCO}_3$  / 50 % ethanol) for 20 min and dehydrated with 100 % ethanol for 10 min and then vacuum centrifuged. Gel pieces were reduced with 10 mM DTT for 45 min at 56 °C and alkylated with 55 mM iodoacetamide (BioUltra-Sigma-Aldrich Corp.) for 30 min at RT in the dark. After two steps of washing / dehydration, samples were dehydrated twice with 100 % ethanol for 15 min and vacuum centrifuged. Gel pieces were digested overnight at 37 °C in 50  $\mu\text{L}$  of digestion buffer containing 12.5 ng/ $\mu\text{L}$  of LysC (Wako). Released peptides were extracted (collecting separately the liquid mixture of each samples at each step) once by adding 100  $\mu\text{L}$  of 30 % acetonitrile LC/MS grade (Thermo Scientific) / 3 % trifluoroacetic acid (TFA, protein sequence analysis grade, Sigma-Aldrich) in water (LC/MS grade quality, Thermo Scientific), twice by adding 70 % acetonitrile, followed by two final extractions with

100 % acetonitrile. Extracts were vacuum centrifuged to remove acetonitrile and subsequently acidified with 0.5 % TFA. Samples containing peptides were desalted and concentrated with homemade "STAGE" tips (Stop and Go extraction tips) filled with C-18 (C18 Empore Disks, 3M, Minneapolis, MN) as described earlier (4, 5). Reverse phase nano-LC-MS/MS was done by using a nanoflow liquid chromatography (LC) system (Proxeon, Denmark). The LC system was coupled to LTQ-Orbitrap Velos instrument (Thermo Fisher Scientific) equipped with a nanoelectrospray source (Proxeon). Chromatographic separation of peptides was performed in a 10-cm long and 75- $\mu$ m inner diameter capillary needle. The column was custom-made with methanol slurry of reverse-phase ReproSil-Pur C18-AQ 3- $\mu$ m resin (Dr. Maisch GmbH). The tryptic peptide mixtures were autosampled at a flowrate of 0.5  $\mu$ l/min and then eluted with a linear gradient within 150 min at a flow rate 0.25  $\mu$ l/min. The LTQ-Orbitrap Velos mass spectrometer was operated in the data-dependent mode to automatically measure MS and MS/MS spectra. For CID-MS/MS top15 method, full scan MS spectra (from  $m/z$  300–1700) were acquired in the Orbitrap analyzer after accumulation to a target value of  $1e6$  in the linear ion trap. Resolution in the Orbitrap system was set to  $r = 60,000$  and the 15 most intense peptide ions with charge states  $\geq 2$  were isolated to a target value of 5,000 and fragmented in the linear ion trap CID with normalized collision energy of 35% (6). An activation  $q = 0.25$  and activation time of 10 ms were used. For data analysis we used the MaxQuant software tool (Version 1.2.0.18). The measured raw data were processed and quantitated as described by Cox et al (7). Briefly, a peak list was generated using the following parameters: maximum mass deviation for precursor ions was 20 ppm and 0.5 Da for CID fragment ions. A maximum of 1 missed cleavage was allowed and enzyme specificity was set to LysC. In addition, the heavy amino acid Lysin-6 was chosen as fixed modification and variable modifications included Oxidation (M), and Acetyl (Protein N-term). The MaxQuant generated peak list was searched against the human International Protein Index (IPI) database v3.68 including a list of common contaminants such as keratins and concatenated with reverse copies of all

sequences. Incorporation of protein groups was calculated as relative isotope incorporation (RII) (ratio / (1 + ratio)). Following quantile normalization RII-ratios were calculated between conditions and t-tests (two sided, equal variance) were performed on duplicates from KO and WT. To perform label-free quantification the corresponding heavy and light protein group intensities per condition were added and normalized by peptide count. Following quantile normalization protein group intensity ratios were calculated between conditions and t-tests (two-sided, equal variance) were carried out on duplicates from KO and WT.

**Exercise tolerance test.** Exercise tolerance test was performed using a protocol similar to that used before (8, 9). Briefly aged Atrogin-1 KO male mice and age- and sex-matched littermate controls were left to adapt to treadmill at a speed of 10 cm/sec for 5 minutes, then mice ran at a speed of 15 cm/sec for 5 minutes. Finally the speed was increased of 3cm/sec every 10 minutes until the mice were exhausted (8, 10). The exercise test was repeated another time after 24 hours.

**Skeletal muscle electroporation.** Adult control C57BL/6J mice underwent skeletal muscle electroporation following the procedure previously described (11).

**Rat neonatal cardiomyocyte isolation and culture.** P1 neonatal rats were sacrificed by cervical dislocation, hearts were removed, minced in ADS (5 mM glucose, 106 NaCl, 5.3 KCl, 20 Hepes, 0.8 Na<sub>2</sub>HPO<sub>4</sub>, 0.4 MgSO<sub>4</sub>, in mM) and then enzymatically dissociated with collagenase A (0.4 mg/ml) (Roche) and pancreatine (1.2 mg/ml) (Sigma). Cells were cultured in medium containing 65% DMEM, 17% M199, 5% HS, 2.5% NCS, L-glutamine and antibiotics and plated on laminin-coated dishes (10 µg/cm<sup>2</sup>) at a density of 60000 cells/cm<sup>2</sup> and maintained in a humidified atmosphere (5% CO<sub>2</sub>) at 37°C.

**Cell transfection.** Three days after plating cardiomyocytes were transfected with the following vectors: i) LC3-YFP, ii) CHMP2B or iii) LC3-YFP + CHMP2B, by using transfectin (Biorad, Milan, Italy) as recommended by the manufacturer. A group of transfected cells were also treated with the 200nM Bafilomycin for 12 hours before fixation. Cells were fixed with 4% PFA 30 min. at 4°C and used for

immunofluorescence and morphometric analyses. The plasmid encoding CHMP2B was a kind gift by P.I. Hanson and M. Salvi (Dep of Biomedical Sciences, University of Padova, Italy) and LC3-YFP was kindly shared by E Kominami (Department of Biochemistry, Juntendo University School of Medicine, 2-1-1 Hongo, Bunkyo-ku, Tokyo 113-8421, Japan).

## Supplementary Figure Legends

### **Figure 1. Atrogin-1 knock-out (KO) mice develop interstitial fibrosis and show reduced lifespan.**

(a-b) Confocal immunofluorescence analysis on ventricular cryosections from control (a) and Atrogin-1 KO (b) mice co-stained with antibodies to sarcomeric actinin ( $\alpha$ -actinin, green signal) and collagen I (red signal). White arrows show abundant collagen I interstitial accumulation. LA: left atrium. Scale bar: 500 $\mu$ m; high magnification 50 $\mu$ m. (c) Confocal immunofluorescence analysis on ventricular cryosections from control (left panel) and Atrogin-1 KO (right panel) mice stained with an antibody specific for collagen VI. Scale bar: 50 $\mu$ m; insets, 25 $\mu$ m. (d) Western blotting analysis on ventricular extracts from aged control (C) and Atrogin-1 KO (KO) mice, showing a significant collagen VI accumulation in Atrogin-1 KO hearts. Coomassie blue staining is shown as loading control. MW, Molecular Weight. (e) Exercise tolerance test in sixteen month old control (white bar) and Atrogin-1 KO (black bar) mice. Bars represent mean $\pm$ s.e.m. (\*,  $P < 0.05$ ;  $n = 5$  mice for each group). Note that Atrogin-1 KO mice have a reduced tolerance to exercise, compared to controls.

### **Figure 2. Atrogin-1 knock-out hearts show increased cardiomyocyte apoptosis and anomalous cardiomyocyte ultrastructure.**

(a) Confocal immunofluorescence analysis on ventricular cryosections from nine month old control (left panel) and Atrogin1 KO (right panel) mice co-stained with an antibody specific for cleaved caspase-3 (red signal) and wheat germ agglutinin (wga, green signal). Arrows indicate apoptotic cardiomyocytes in an Atrogin-1 KO heart. Scale bar: 25 $\mu$ m. (b) Electron micrographs on ventricular thin sections from a sixteen mo. old Atrogin-1 KO mouse. The inset shows abnormal ER cisternae in Atrogin-1 KO cardiomyocytes. Scale bar: (left panel) 1 $\mu$ m; (right panel) 500 nm.

**Figure 3. Atrogin-1 knock-out hearts show impaired autophagy.**

(a) Confocal immunofluorescence analysis on ventricular cryosections from sixteen month old Atrogin-1 KO mice co-stained with antibodies specific for sarcomeric actinin ( $\alpha$ -actinin, green signal) and LC3 (red signal), showing LC3 accumulation in Atrogin-1 KO cardiomyocytes (white arrows). Images are details from the LV. Scale bars: 25 $\mu$ m. (b) Confocal immunofluorescence analysis on ventricular cryosections from sixteen month old Atrogin-1 KO mice co-stained with antibodies against LC3 (green signal) and p62 (red signal), showing no co-expression of LC3 and p62 aggregates in Atrogin-1 KO LV cardiomyocytes. Scale bar: 25 $\mu$ m. (c-d) Confocal immunofluorescence analysis on ventricular cryosections from wild-type mice (c) and wild-type mice which undergone nutrient deprivation (d), co-stained with antibodies against LC3 (green signal) and p62 (red signal). Scale bar: 25 $\mu$ m.

**Figure 4. No LC3 and LAMP2 co-expression in aged Atrogin-1 knock-out cardiomyocytes.**

(a) Confocal immunofluorescence analysis on ventricular cryosections from sixteen month old Atrogin-1 KO mice co-stained with antibodies against LC3 (green signal) and LAMP2 (red signal), showing no co-expression of LC3 and LAMP2 in Atrogin-1 KO cardiomyocytes. Images are details from the LV. The merge image of LC3, LAMP2 and bright field is shown. Scale bars: (a) 25 $\mu$ m; inset, 5 $\mu$ m. (b-d) Confocal



immunofluorescence analysis on ventricular cryosections from wild-type mice **(b)** and wild-type mice which undergone nutrient deprivation **(c)** or bafilomycin treatment **(d)** and co-stained with antibodies specific for LC3 (green signal) and p62 (red signal). Scale bar: 20 $\mu$ m; insets 5 $\mu$ m.

**Figure 5. CHMP2B accumulation in Atrogin-1 knock-out cardiomyocytes.**

**(a-b)** Confocal immunofluorescence analysis on ventricular cryosections from sixteen month old control **(a)** and Atrogin-1 KO **(b)** mice co-stained with antibodies against sarcomeric actinin ( $\alpha$ -actinin, green signal) and CHMP2B (red signal), showing accumulation of CHMP2B in Atrogin-1 KO cardiomyocytes (white arrows). Images are details from the LV. Scale bars: 50 $\mu$ m; (inset) 10  $\mu$ m. **(c)** Confocal immunofluorescence analysis of ventricular cryosections from sixteen month old Atrogin-1 KO mice co-stained with antibodies against CHMP2B (green signal) and LAMP2 (red signal), showing no co-expression of LAMP2 and CHMP2B in Atrogin-1 KO cardiomyocytes. Scale bar: 25 $\mu$ m; inset 7 $\mu$ m.

**Figure 6. CHMP2B accumulation in cultured cardiomyocytes upon MG132 cell treatment.**

**(a-b)** Confocal immunofluorescence analysis on control **(a)** and MG132-treated **(b)** neonatal cultured cardiomyocytes co-stained with antibodies against cardiac Troponin I (cTnI, green signal) and CHMP2B (red signal), showing CHMP2B accumulation in MG132-treated cells. Note that CHMP2B accumulates in cardiomyocyte areas characterized by sarcomeric depletion. Nuclei were counterstained with DAPI (blue signal). Scale bars: 25 $\mu$ m; insets in **(a)** 10 $\mu$ m and 1 $\mu$ m; insets in **(b)** 10 $\mu$ m and 5 $\mu$ m.

**Figure 7. Adenoviral mediated CHMP2B down-regulation in Atrogin-1 knock-out mice.**

**(a)** Confocal immunofluorescence analysis on ventricular cryosections from Atrogin-1 KO mice injected with an AAV9-GFP-U6-CHMP2Bsh viral vector co-stained with antibodies specific for GFP **(a)**, green

signal, left panel) and CHMP2B (red signal, middle panel). The right panel represents the merge of (the left) and (the middle) panels. Note that CHMP2B signal is significantly lower in GFP positive cardiomyocytes indicating the efficiency of CHMP2B down-regulation. Scale bar: 25 $\mu$ m. (b) Confocal immunofluorescence analysis on ventricular cryosections from Atrogin-1 KO mice injected with an AAV9-GFP control viral vector co-stained with antibodies specific for GFP (green signal, left panel) and CHMP2B (red signal, middle panel). The right panel represents the merge of (the left) and (the middle) panels. Note no decrease in CHMP2B signal in GFP positive cardiomyocytes. Scale bar: 25 $\mu$ m.

### Supplementary References.

1. Sandri, M., Sandri, C., Gilbert, A., Skurk, C., Calabria, E., Picard, A., Walsh, K., Schiaffino, S., Lecker, S.H., and Goldberg, A.L. 2004. Foxo transcription factors induce the atrophy-related ubiquitin ligase atrogin-1 and cause skeletal muscle atrophy. *Cell* 117:399-412.
2. Pfaffl, M.W. 2001. A new mathematical model for relative quantification in real-time RT-PCR. *Nucleic Acids Res* 29:e45.
3. Shevchenko, A., Tomas, H., Havlis, J., Olsen, J.V., and Mann, M. 2006. In-gel digestion for mass spectrometric characterization of proteins and proteomes. *Nat Protoc* 1:2856-2860.
4. Kruger, M., Moser, M., Ussar, S., Thievensen, I., Lubner, C.A., Forner, F., Schmidt, S., Zanivan, S., Fassler, R., and Mann, M. 2008. SILAC mouse for quantitative proteomics uncovers kindlin-3 as an essential factor for red blood cell function. *Cell* 134:353-364.
5. Rappsilber, J., Ishihama, Y., and Mann, M. 2003. Stop and go extraction tips for matrix-assisted laser desorption/ionization, nanoelectrospray, and LC/MS sample pretreatment in proteomics. *Anal Chem* 75:663-670.
6. Olsen, J.V., Macek, B., Lange, O., Makarov, A., Horning, S., and Mann, M. 2007. Higher-energy C-trap dissociation for peptide modification analysis. *Nat Methods* 4:709-712.
7. Cox, J., Matic, I., Hilger, M., Nagaraj, N., Selbach, M., Olsen, J.V., and Mann, M. 2009. A practical guide to the MaxQuant computational platform for SILAC-based quantitative proteomics. *Nat Protoc* 4:698-705.
8. He, C., Bassik, M.C., Moresi, V., Sun, K., Wei, Y., Zou, Z., An, Z., Loh, J., Fisher, J., Sun, Q., et al. 2012. Exercise-induced BCL2-regulated autophagy is required for muscle glucose homeostasis. *Nature* 481:511-515.
9. Grumati, P., Coletto, L., Schiavinato, A., Castagnaro, S., Bertaglia, E., Sandri, M., and Bonaldo, P. 2011. Physical exercise stimulates autophagy in normal skeletal muscles but is detrimental for collagen VI-deficient muscles. *Autophagy* 7:1415-1423.
10. Wende, A.R., Schaeffer, P.J., Parker, G.J., Zechner, C., Han, D.H., Chen, M.M., Hancock, C.R., Lehman, J.J., Huss, J.M., McClain, D.A., et al. 2007. A role for the transcriptional coactivator PGC-1 $\alpha$  in muscle refueling. *J Biol Chem* 282:36642-36651.

11. Sandri, M., Bortoloso, E., Nori, A., and Volpe, P. 2003. Electrotransfer in differentiated myotubes: a novel, efficient procedure for functional gene transfer. *Exp Cell Res* 286:87-95.

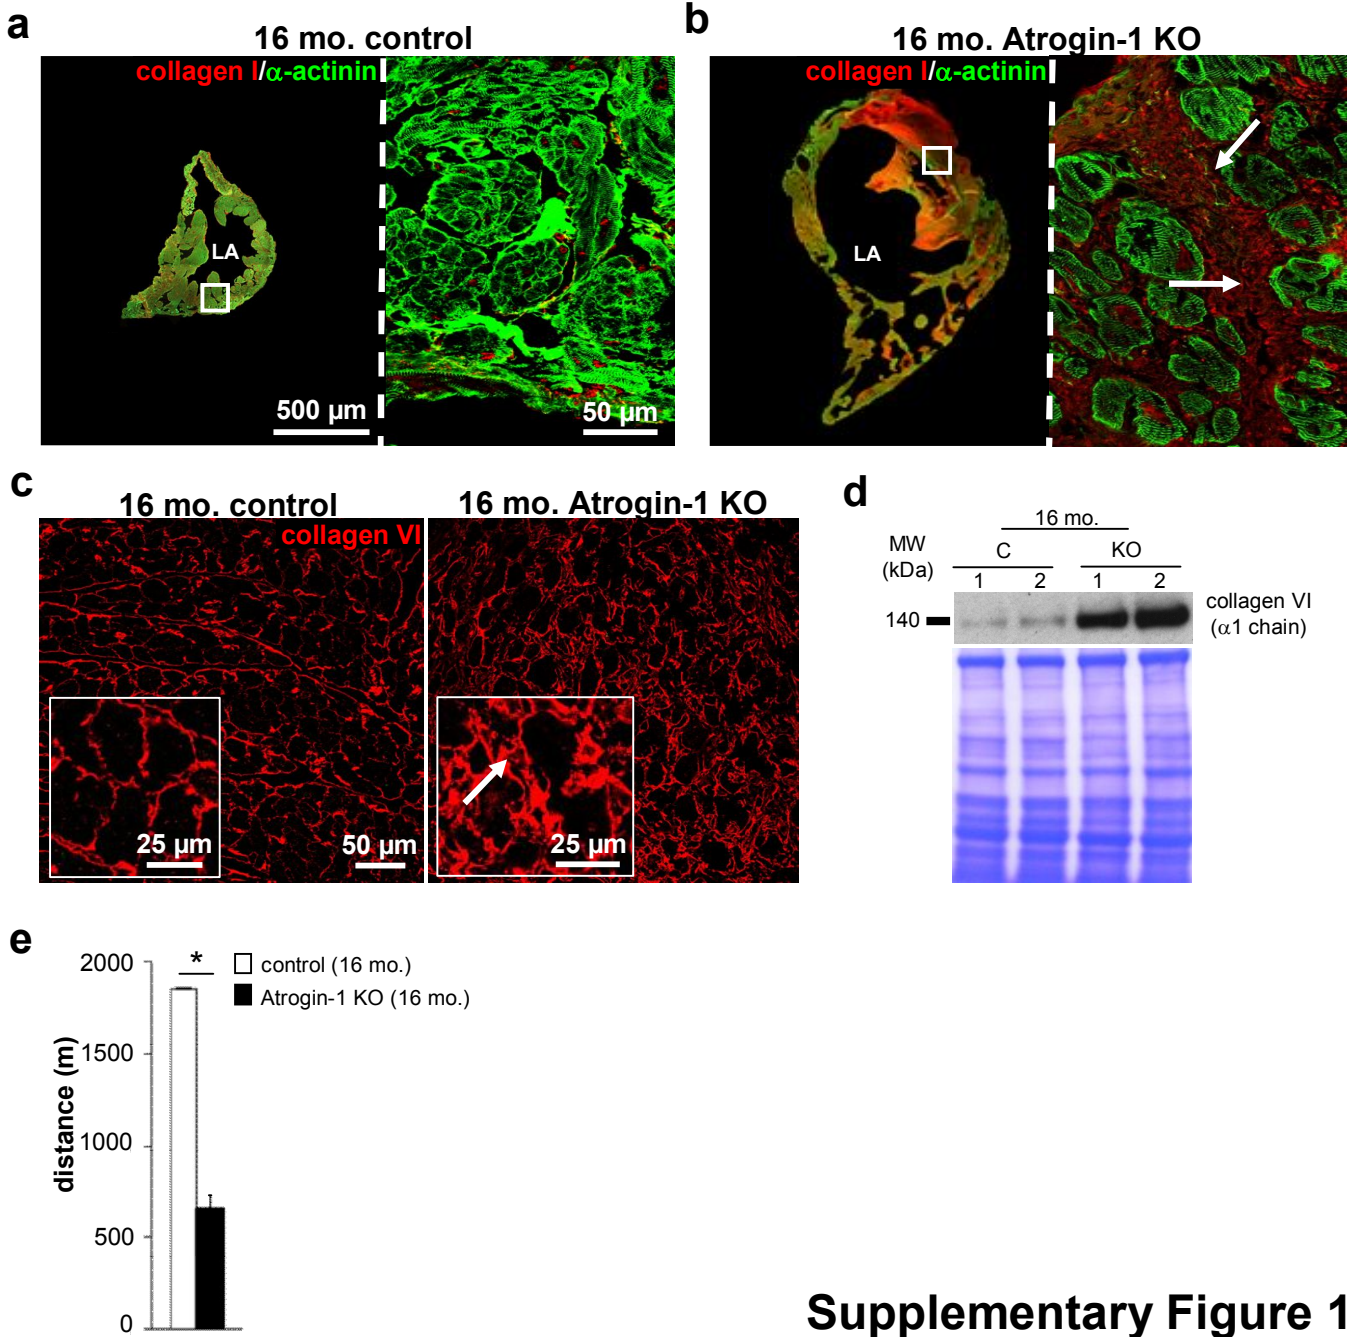

Supplementary Figure 1

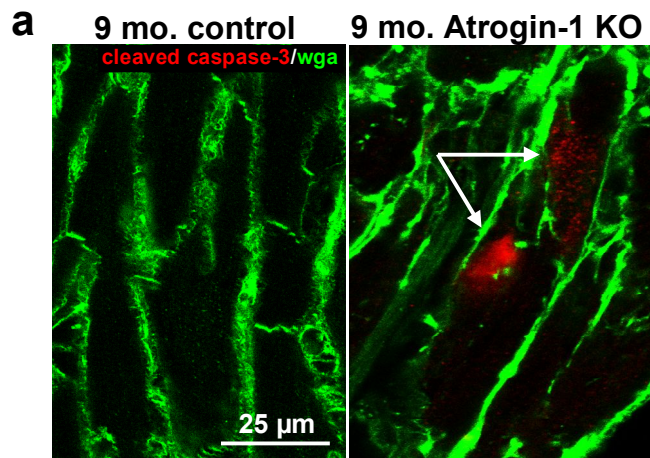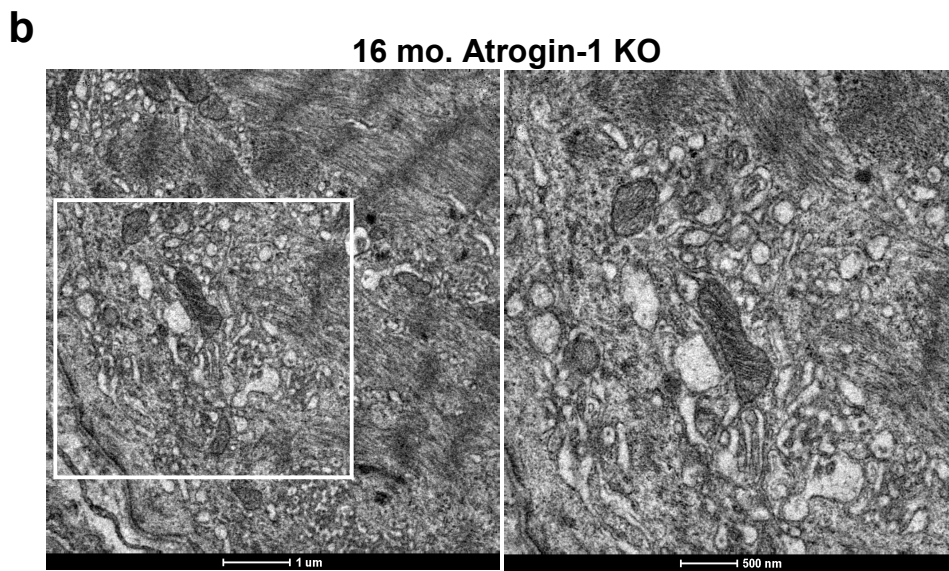

**Supplementary Figure 2**

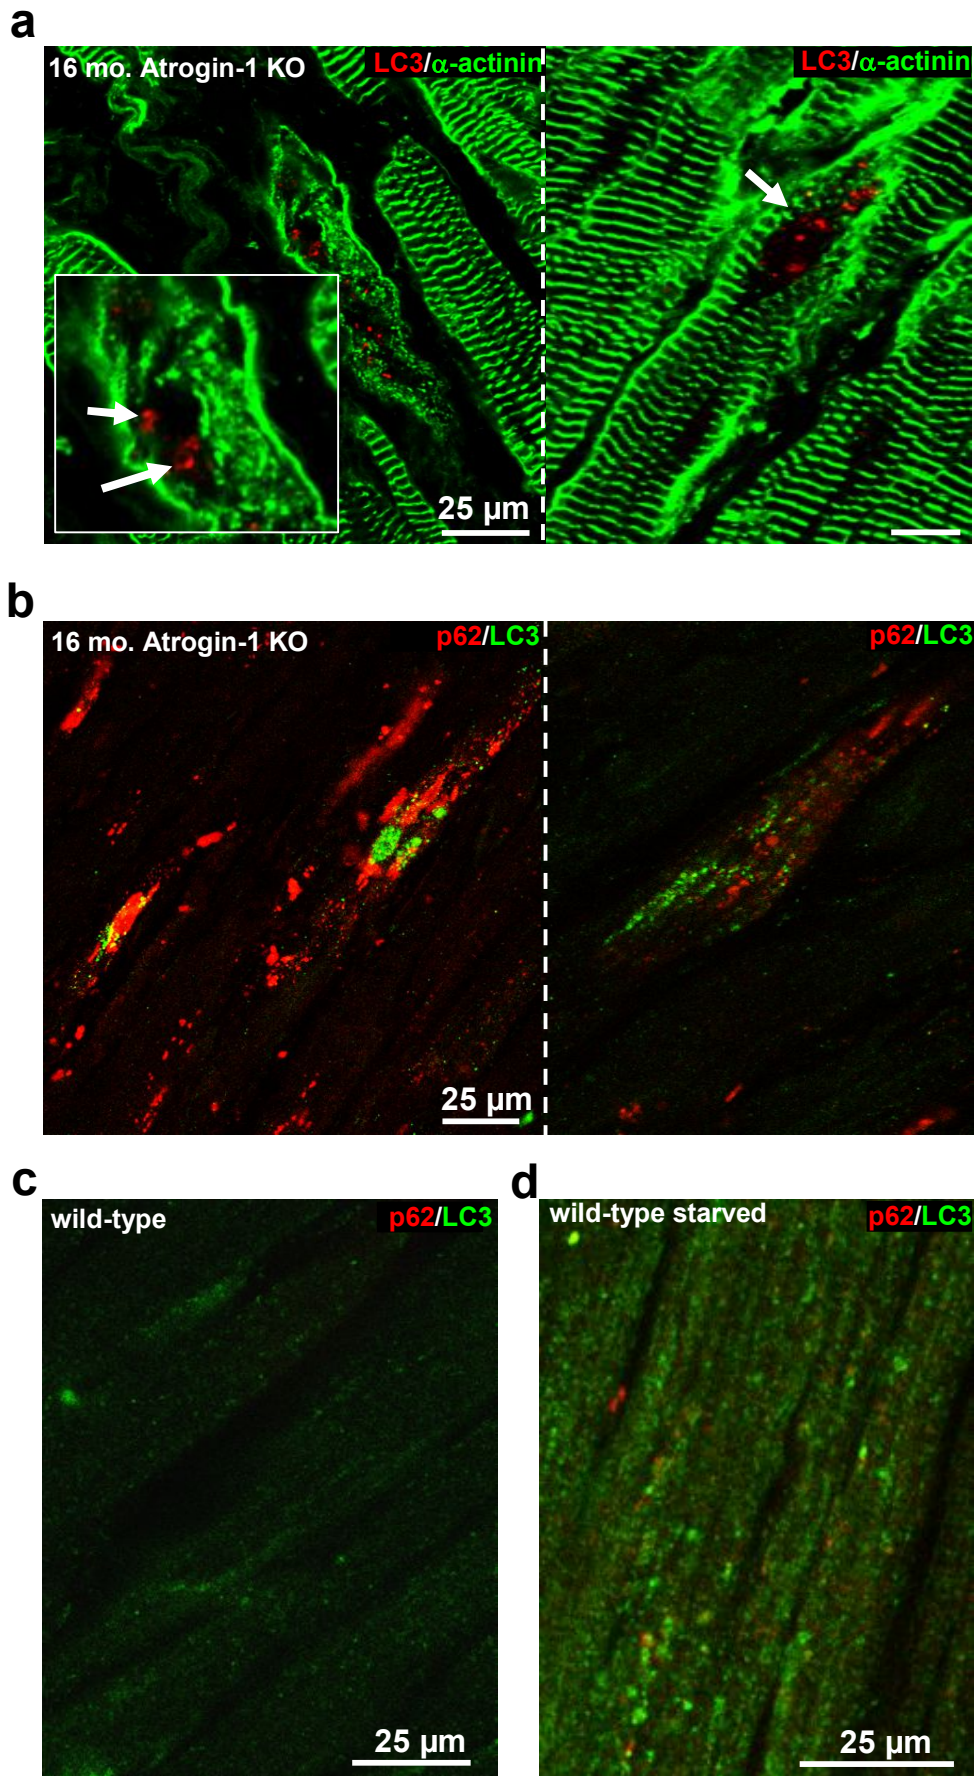

Supplementary Figure 3

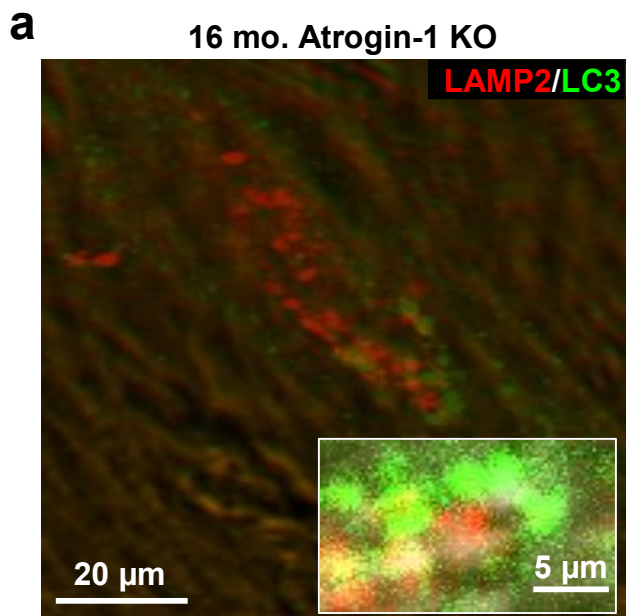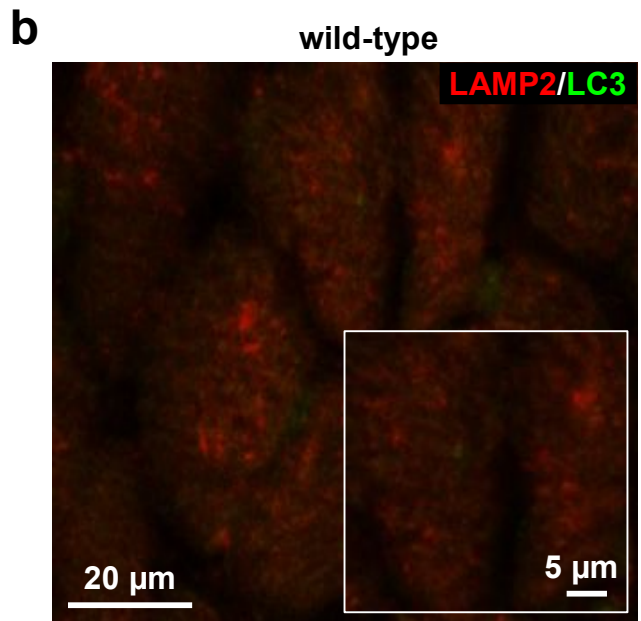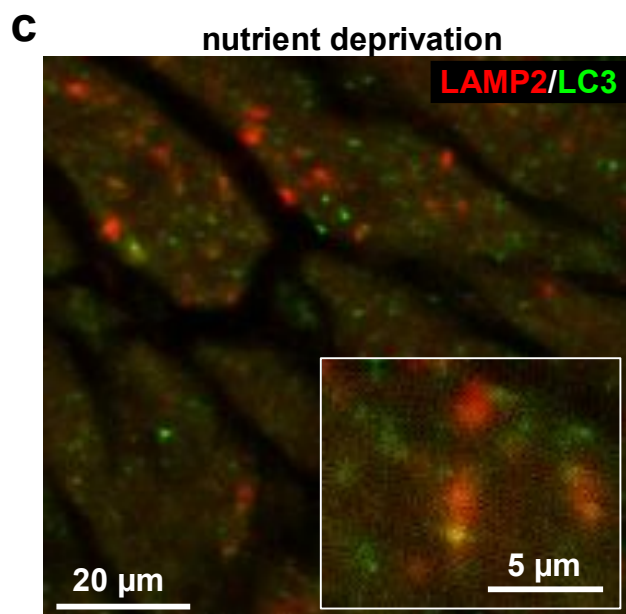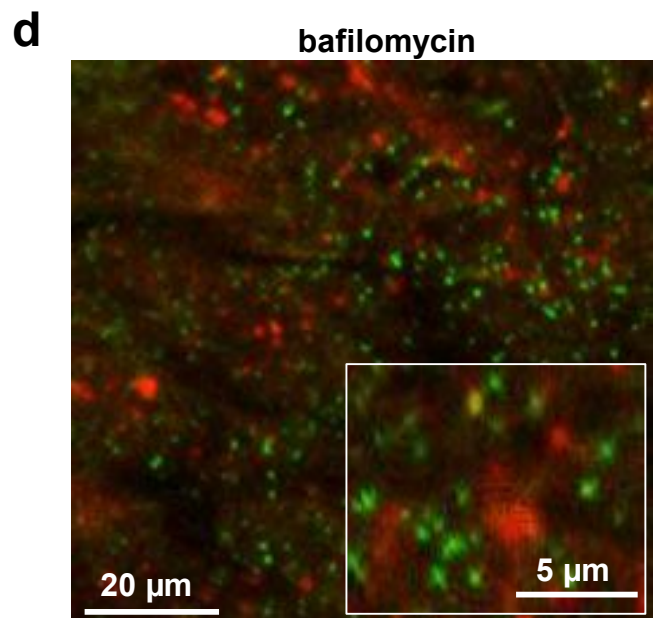

**Supplementary Figure 4**

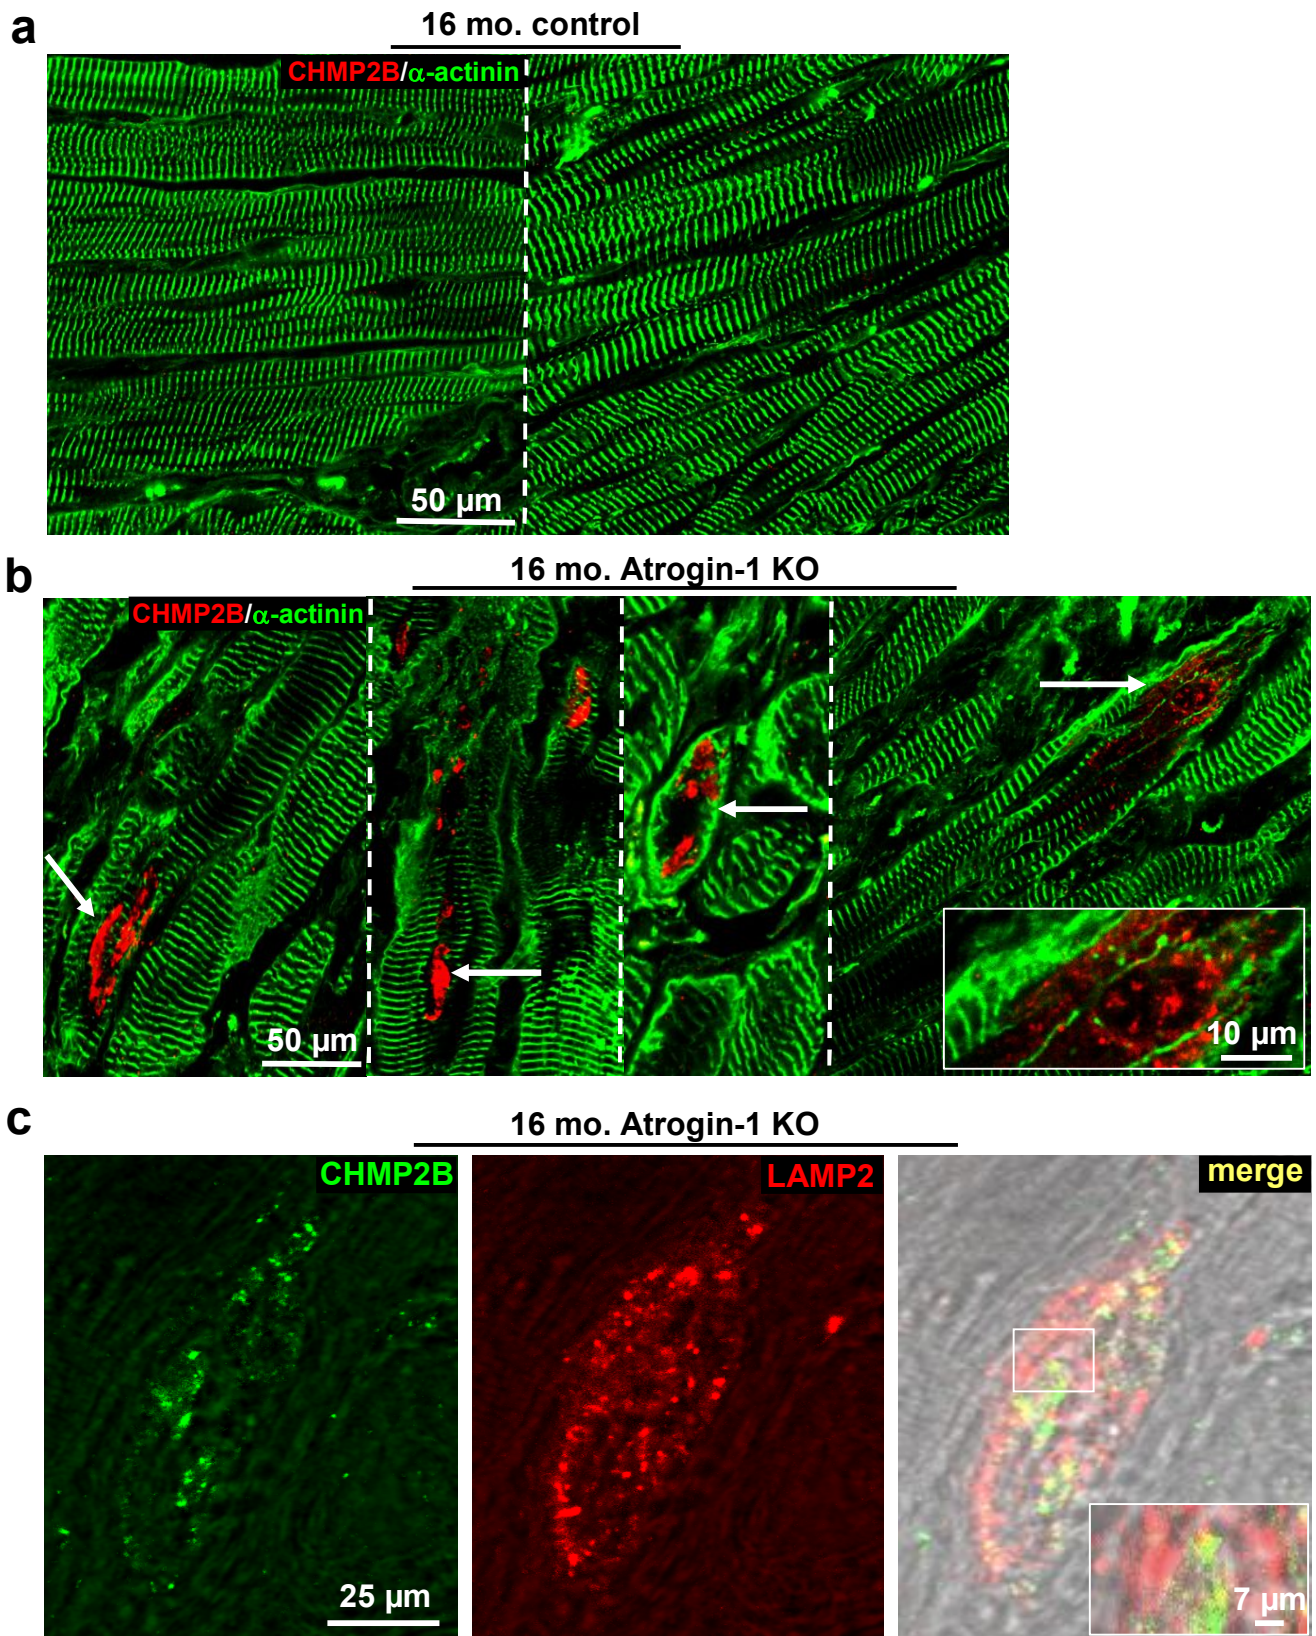

Supplementary Figure 5



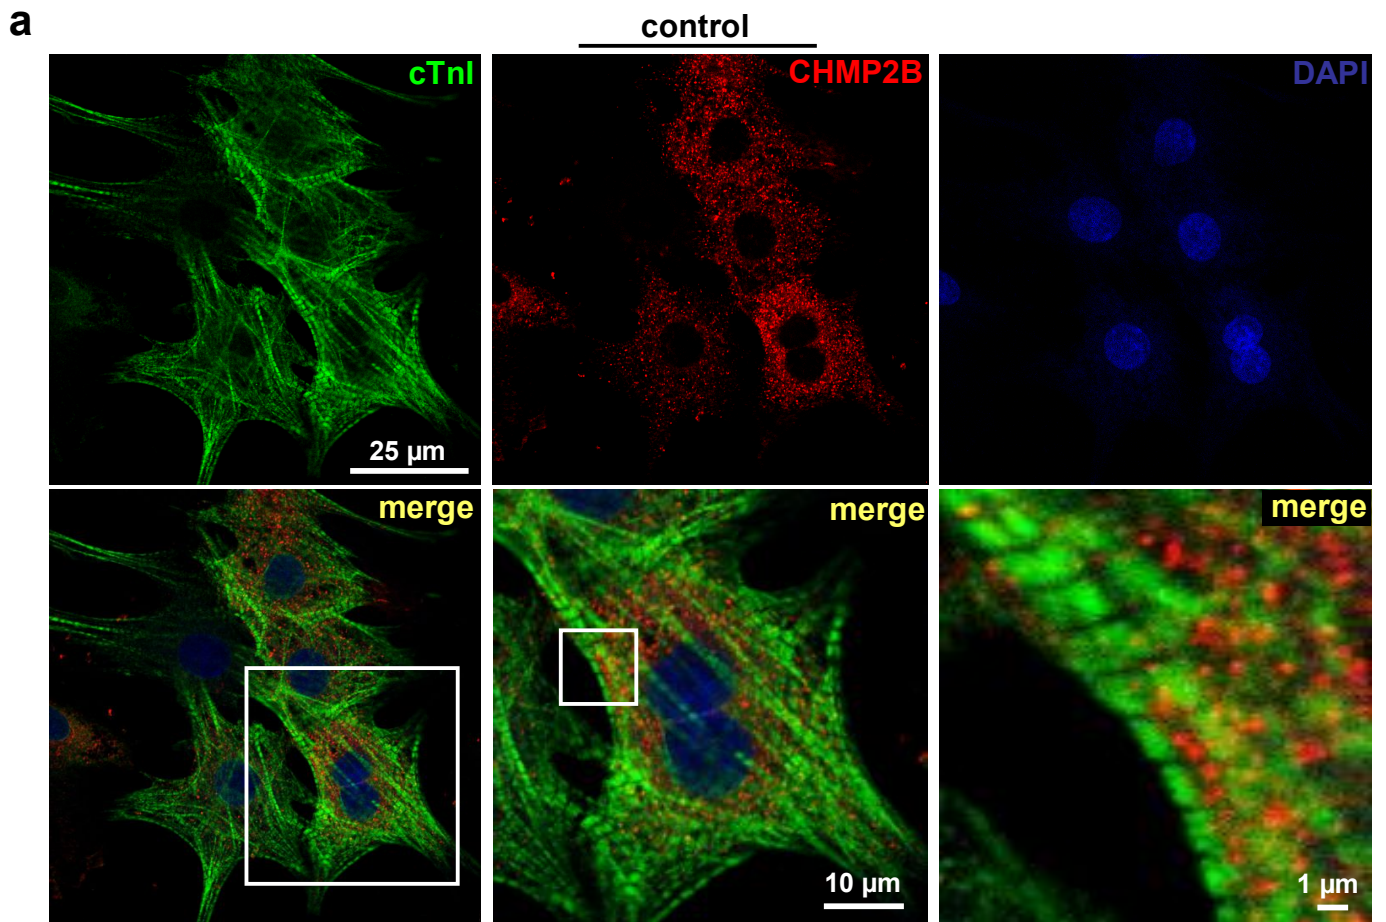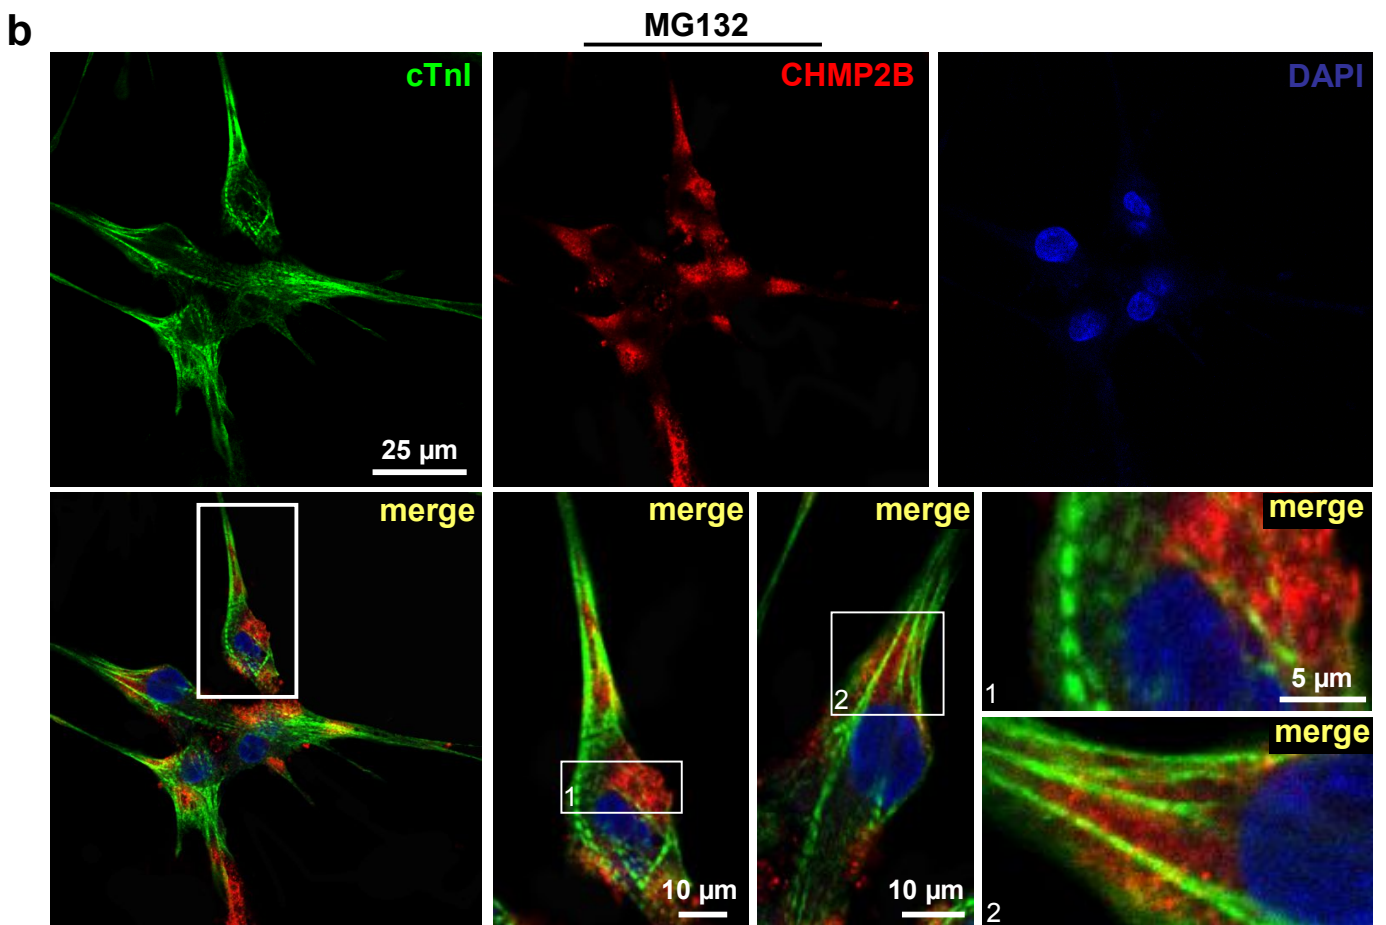

**Supplementary Figure 6**

**a**

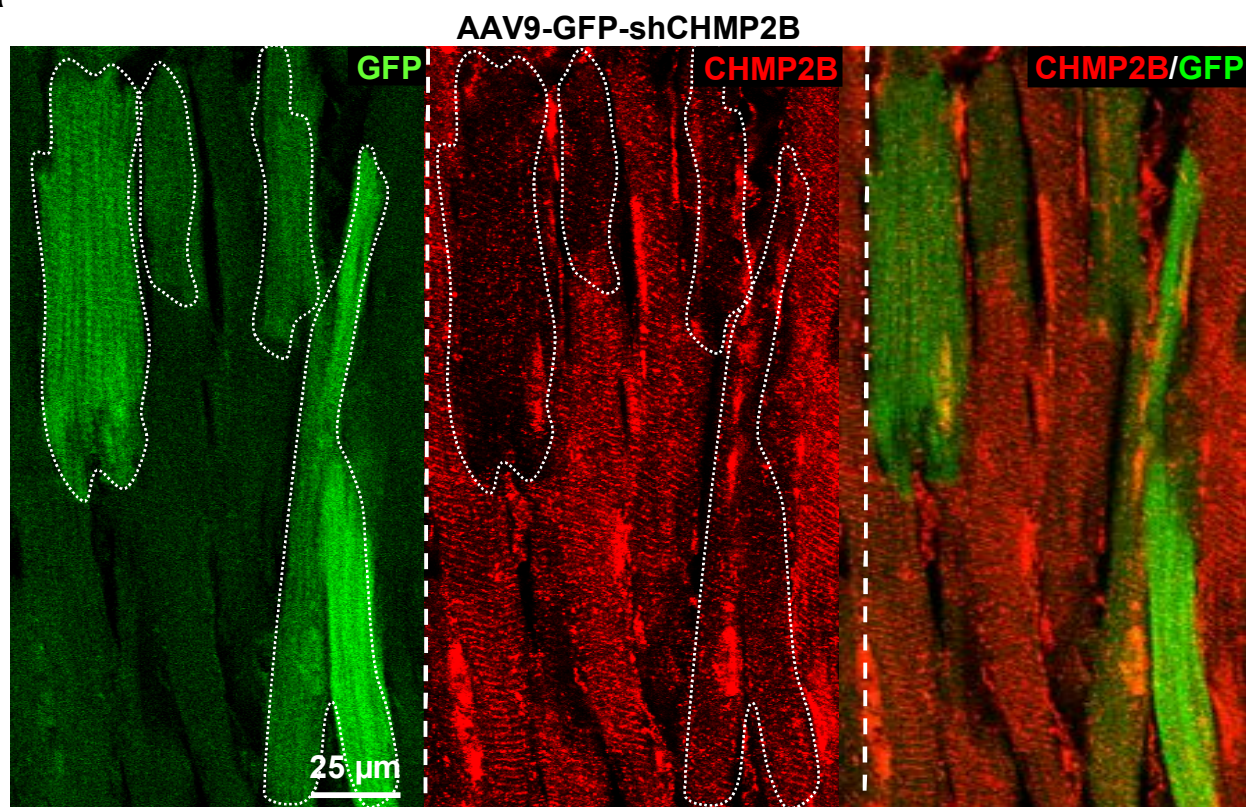

**b**

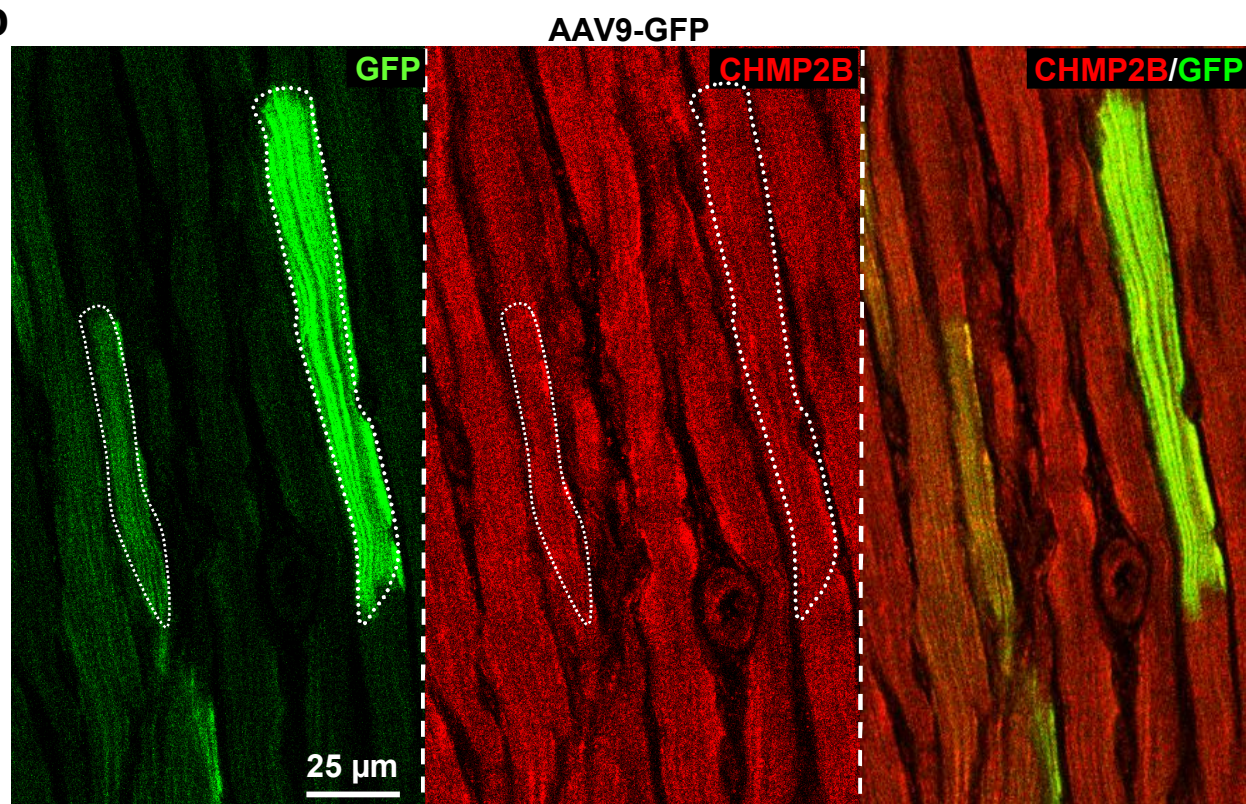

**Supplementary Figure 7**



| <b>Parameters</b>     | <b>Controls<br/>(n=5)</b> | <b>MAFbx KO<br/>(n=7)</b> | <b>P-value</b> |
|-----------------------|---------------------------|---------------------------|----------------|
| LV mass (mg)          | 106.5±15.3                | 133±31                    | <0.05          |
| AAPD (mm)             | 2.1±0.3                   | 4.3±0.4                   | <0.01          |
| Sphericity Index (d.) | 0.45±0.1                  | 0.81±0.1                  | <0.01          |
| Sphericity Index (s.) | 0.34±0.1                  | 0.57±0.1                  | <0.05          |

**Supplementary Table 1.** Echocardiography analysis in 16 month old control and Atrogin-1 KO mice. Abbreviations: LV: Left Ventricle; AAPD: Atrium Antero-Posterior Diameter; d.: diastole; s.: systole; n.s.: no significant.

| <b>Protein Names</b>                                              | <b>Gene Names</b>          | <b>T test</b> |
|-------------------------------------------------------------------|----------------------------|---------------|
| Ras-related protein Rab-2A                                        | Rab2a                      | 0,0258        |
| Myo18b protein                                                    | Myo18b                     | 0,0458        |
| UPF0568 protein C14orf166 homolog                                 | 2700060E02Rik              | 0,0003        |
| Beta-coat protein                                                 | Copb1                      | 0,0108        |
| Calcium/calmodulin-dependent protein kinase type II subunit delta | Camk2d                     | 0,0290        |
| 6-phosphofructokinase, muscle type                                | Pfka                       | 0,0051        |
| Programmed cell death 6 interacting protein                       | Pdcd6ip                    | 0,0208        |
| <b>15S Mg(2+)-ATPase p97 subunit</b>                              | <b>Vcp</b>                 | 0,0344        |
| <b>BCL2-associated athanogene 3</b>                               | <b>Bag3</b>                | 0,0361        |
| Adenylate kinase 3-like                                           | Ak3b                       | 0,0061        |
| Diadenosine tetraphosphate synthetase                             | Gars                       | 0,0284        |
| Ankyrin repeat domain-containing protein 25                       | Ankrd25                    | 0,0228        |
| T-complex protein 1 subunit beta                                  | Cct2                       | 0,0373        |
| Dynamin UDNM                                                      | Dnm2                       | 0,0456        |
| Ubiquitin-activating enzyme E1                                    | Sbx                        | 0,0035        |
| Putative uncharacterized protein                                  | Clip1                      | 0,0104        |
| <b>LAMP-1</b>                                                     | <b>Lamp1</b>               | <b>0,0144</b> |
| Molecule associated with JAK3 N-terminus                          | Myo18a                     | 0,0331        |
| Eukaryotic translation initiation factor 4 gamma 1                | Eif4g1                     | 0,0177        |
| Endoplasmic reticulum resident protein 72                         | Cai                        | 0,0469        |
| MKIAA0899 protein                                                 | Ap2a2                      | 0,0248        |
| Beta-taxilin                                                      | Mdp77;Txlnb                | 0,0410        |
| Cytidine monophosphate kinase                                     | Cmk                        | 0,0119        |
| Elongin 15 kDa subunit                                            | Tceb1                      | 0,0263        |
| <b>Microtubule-associated protein tau</b>                         | <b>Mapt</b>                | <b>0,0185</b> |
| Anxa6 protein                                                     | Anxa6                      | 0,0026        |
| 14-3-3 protein gamma                                              | Ywhag;<br>14-3-3 gamma     | 0,0025        |
| Metaxin-2                                                         | MNCb-0780                  | 0,0206        |
| Sorbs2 protein                                                    | Sorbs2;Argbp2;<br>Kiaa0777 | 0,0004        |
| 5-aminoimidazole-4-carboxamide ribonucleotide formyltransferase   | Atic;Purh                  | 0,0412        |
| Probable C->U-editing enzyme APOBEC-2                             | Apobec2                    | 0,0273        |
| Macrophage 23 kDa stress protein                                  | Msp23                      | 0,0166        |
| Alpha-glucosidase 2                                               | G2an                       | 0,0059        |
| BPG-dependent PGAM 2                                              | Pgam2                      | 0,0141        |
| Protein disulfide-isomerase A6                                    | Pdia6;Txndc7               | 0,0157        |
| Fructose-bisphosphate aldolase                                    | Aldoa                      | 0,0185        |
| Importin alpha-S2                                                 | Kpna                       | 0,0336        |
| ATP-binding cassette sub-family F member 2                        | Abcf2                      | 0,0245        |
| MACRO domain-containing protein 1                                 | Lrp16;Macro1               | 0,0139        |
| Nicotinamide phosphoribosyltransferase                            | Nampt                      | 0,0349        |
| NEDD8 carrier protein                                             | Ubc12                      | 0,0476        |
| Guanosine diphosphate dissociation inhibitor 1                    | Gdi1                       | 0,0251        |
| BPG-dependent PGAM 1                                              | Pgam1                      | 0,0000        |
| Ras-related protein Rab-6A                                        | MNCb-1660;Rab6             | 0,0234        |
| Nuclear protein localization protein 4 homolog                    | Kiaa1499                   | 0,0220        |
| C-1-tetrahydrofolate synthase, cytoplasmic                        | Mthfd1;Dcs                 | 0,0468        |
| DEAD (Asp-Glu-Ala-Asp) box polypeptide 19b                        | Ddx19b                     | 0,0342        |
| Adipocyte protein S3-12                                           | Kiaa1881                   | 0,0008        |
| B-CAM cell surface glycoprotein                                   | Bcam                       | 0,0454        |
| Iron-sulfur cluster assembly enzyme ISCU, mitochondrial           | Iscu;Nifun                 | 0,0095        |

|                                                                      |                |        |
|----------------------------------------------------------------------|----------------|--------|
| Cardiovascular heat shock protein;Heat shock protein 25 kDa 2        | Cvhsp          | 0,0339 |
| 78 kDa glucose-regulated protein;Heat shock 70 kDa protein 5         | Grp78          | 0,0335 |
| F-actin-capping protein subunit beta                                 | Cappb1         | 0,0063 |
| Calcium-transporting ATPase sarcoplasmic reticulum type              | Atp2a2         | 0,0287 |
| Importin subunit alpha-4                                             | Kpna4          | 0,0262 |
| Hippocampal cholinergic neurostimulating peptide                     | Pbp            | 0,0423 |
| Protein Hook homolog 3                                               | Hook3          | 0,0380 |
| Glyceraldehyde-3-phosphate dehydrogenase                             | Gapd           | 0,0293 |
| ATP-AMP transphosphorylase 1                                         | Ak1            | 0,0227 |
| MKIAA0838 protein                                                    | Gls            | 0,0168 |
| Leiomodin-2                                                          | Lmod2          | 0,0415 |
| Glucose-6-phosphate isomerase                                        | Gpi;Gpi1       | 0,0482 |
| Phosphoglucomutase 2                                                 | Pgm2           | 0,0489 |
| Rab3 GTPase-activating protein 150 kDa subunit                       | Kiaa0839       | 0,0306 |
| Dystrophin                                                           | Dmd            | 0,0421 |
| ADP-ribosylation factor 1                                            | Arf1           | 0,0159 |
| ER-Golgi intermediate compartment 53 kDa protein                     | Ergic53;Lman1  | 0,0222 |
| 28S ribosomal protein S31, mitochondrial                             | Imogn38;Mrps31 | 0,0348 |
| Actin-binding-like protein; Filamin C                                | Abpl;Fln2;Flnc | 0,0041 |
| Aldehyde reductase                                                   | Akr1b1         | 0,0363 |
| Protein-tyrosine phosphatase SYP                                     | Ptpn11         | 0,0073 |
| Corticosteroid-binding globulin;Serpina6                             | Cbg            | 0,0219 |
| Heme oxygenase 2                                                     | Hmox2          | 0,0209 |
| Bendless-like ubiquitin-conjugating enzyme;Ubc13                     | Blu            | 0,0098 |
| Obscurin                                                             | Gm878          | 0,0148 |
| CapZ alpha-2                                                         | Cappa2         | 0,0195 |
| Glutathione S-transferase P 1                                        | Gstp1          | 0,0461 |
| Cytoplasmic dynein 1 intermediate chain 2                            | Dnci2          | 0,0298 |
| Cadherin 2                                                           | Cdh2           | 0,0390 |
| HESB-like domain-containing protein 2                                | Hbld2;Isca1    | 0,0137 |
| F-actin-binding protein                                              | Nexn           | 0,0277 |
| Myomesin family member 1                                             | Myom1          | 0,0247 |
| 56 kDa selenium-binding protein                                      | Lpsb           | 0,0087 |
| Cysteine-rich protein 2                                              | Crip2          | 0,0107 |
| Fermitin family homolog 2                                            | Fermt2         | 0,0004 |
| [Pyruvate dehydrogenase [lipoamide]] kinase isozyme 4, mitochondrial | Pdk4           | 0,0239 |
| Cardiac muscle troponin T                                            | Tnnt2          | 0,0296 |
| Ubc protein                                                          | Ubc            | 0,0377 |
| Ubiquitin-fold modifier 1                                            | Ufm1           | 0,0363 |
| 3-oxoacid-CoA transferase 1                                          | Oxct           | 0,0420 |
| Aldoketomutase;Glyoxalase I                                          | Glo1           | 0,0414 |
| UPF0317 protein C14orf159 homolog, mitochondrial                     | 9030617O03Rik  | 0,0031 |
| Tropomodulin 1                                                       | mCG_14153      | 0,0155 |
| LDH heart subunit                                                    | Ldh2           | 0,0114 |
| Phosphoglycerate kinase 1                                            | Pgk1           | 0,0003 |
| Putative uncharacterized protein                                     | Lrrfip2        | 0,0033 |
| Cysteine and glycine-rich protein 3                                  | Clp            | 0,0009 |
| Cytosolic malate dehydrogenase                                       | Mdh1           | 0,0102 |
| Actin-RPV                                                            | Actr1a         | 0,0035 |
| Coiled-coil domain containing 141;MCG142258                          | Ccdc141        | 0,0086 |
| Alcohol dehydrogenase iron-containing protein 1                      | Adhfe1         | 0,0393 |
| Glutathione-independent PGD synthase                                 | Ptgds          | 0,0113 |
| Isochorismatase domain-containing protein 1                          | Isoc1          | 0,0242 |

|                                                                      |          |        |
|----------------------------------------------------------------------|----------|--------|
| S100 calcium binding protein A1                                      | S100a1   | 0,0088 |
| Triosephosphate isomerase                                            | Tpi      | 0,0441 |
| Complex III subunit 8                                                | Uqcrcq   | 0,0182 |
| Myosin regulatory light chain 2, ventricular/cardiac muscle isoform  | Myl2;    | 0,0256 |
| 2-phospho-D-glycerate hydro-lyase                                    | Eno3     | 0,0014 |
| Aspartate aminotransferase, cytoplasmic                              | Got1     | 0,0298 |
| Pleckstrin homology domain containing, family C                      | Fermt2   | 0,0039 |
| Pyruvate dehydrogenase phosphatase regulatory subunit, mitochondrial | Kiaa1990 | 0,0280 |
| Mannose-6-phosphate isomerase                                        | Mpi      | 0,0041 |
| Putative uncharacterized protein                                     | Nqo2     | 0,0229 |
| Leucine zipper and CTNNBIP1 domain-containing protein                | Lzic     | 0,0491 |
| SH3 domain-binding glutamic acid-rich protein                        | Sh3bgr   | 0,0420 |
| Cytochrome c oxidase subunit 7A2, mitochondrial                      | Cox7a2   | 0,0058 |
| Four and a half LIM domains protein 2                                | Fhl2     | 0,0028 |
| AMP deaminase 3                                                      | Ampd3    | 0,0349 |
| Iron-sulfur subunit of complex II                                    | Sdhb     | 0,0312 |
| Cardiomyopathy-associated protein 1                                  | Cmya1    | 0,0290 |
| Myosin light chain 1                                                 | Mlc1v    | 0,0200 |
| Troponin C                                                           | Tncc     | 0,0137 |
| Actin-depolymerizing factor                                          | Gsb      | 0,0042 |
| Myosin regulatory light chain 2, atrial isoform                      | Myl7     | 0,0428 |
| LIM domain-binding protein 3                                         | Kiaa0613 | 0,0418 |
| Collagen alpha-6(VI) chain                                           | Col6a6   | 0,0420 |
| Myosin heavy chain 2b                                                | Myh4     | 0,0223 |
| Cardiac troponin I                                                   | Tnni3    | 0,0180 |
| S1 RNA-binding domain-containing protein 1                           | Srbd1    | 0,0176 |
| Myosin light chain 1, atrial/fetal isoform                           | Mlc1a    | 0,0006 |
| Myosin heavy chain, cardiac muscle alpha isoform                     | Myh6     | 0,0011 |
| Sodium channel protein cardiac muscle subunit alpha                  | Scn5a    | 0,0104 |
| Creatine kinase M chain                                              | Ckm      | 0,0191 |
| Gamma-tropomyosin                                                    | Tpm3     | 0,0004 |
| Alpha-tropomyosin                                                    | Tpm1     | 0,0239 |
| Actin, alpha cardiac muscle 1                                        | Actc1    | 0,0036 |
| Laminin subunit beta-2                                               | Lamb2    | 0,0026 |

**Supplementary Table 2.** Protein turnover down in Atrogin-1 KO mice.

| <b>Protein Names</b>                                          | <b>Gene Names</b> | <b>T test</b> |
|---------------------------------------------------------------|-------------------|---------------|
| Beta-actin-like protein 2                                     | Actbl2            | 0,0026        |
| PC1-like 3 protein                                            | 71B10             | 0,1224        |
| Alpha-tropomyosin                                             | Tpm1              | 0,0198        |
| CCT-zeta-2                                                    | Cct6b             | 0,4533        |
| Myosin heavy chain 2b                                         | Myh4              | 0,0006        |
| Cardiac troponin I                                            | Tnni3             | 0,0011        |
| Endoplasmic reticulum resident protein 29                     | Erp29             | 0,4547        |
| ATP-binding cassette, sub-family B (MDR/TAP), member 7        | Abcb7             | 0,3440        |
| Acylase III                                                   | Acy3              | 0,0420        |
| Cytochrome c oxidase subunit 7A1, mitochondrial               | Cox7a             | 0,0974        |
| Troponin C, slow skeletal and cardiac muscles                 | Tncc              | 0,1781        |
| GCN1 general control of amino-acid synthesis 1-like 1 (Yeast) | Gcn111            | 0,0428        |
| Phosphoglycerate kinase 1                                     | Pgk1              | 0,6515        |
| Cytochrome c oxidase subunit 7A2, mitochondrial               | Cox7a2            | 0,0033        |
| 1,5-anhydro-D-fructose reductase                              | Akr1cl2           | 0,0349        |
| Clathrin interactor 1                                         | Clint1            | 0,0523        |
| Mannose-6-phosphate isomerase                                 | Mpi               | 0,2309        |
| Integrin alpha-7                                              | Itga7             | 0,0229        |
| GrinchGEF                                                     | Arhgef10          | 0,4608        |
| Actin-RPV                                                     | Actr1a            | 0,2122        |
| CLIP-associating protein 2                                    | Clasp2            | 0,0086        |
| LIM domain-binding protein 3                                  | Kiaa0613          | 0,1479        |
| Cysteine--tRNA ligase                                         | Cars2             | 0,0794        |
| Connectin                                                     | Ttn               | 0,5047        |
| Nucleoside diphosphate-linked moiety X motif 8, mitochondrial | Nudt8             | 0,4567        |
| GTP-binding protein SAR1b                                     | Sar1b             | 0,2162        |
| Protein transport protein Sec61 subunit beta                  | Sec61b            | 0,3834        |
| Biliverdin reductase A                                        | Blvra             | 0,2495        |
| Magnesium-dependent phosphatase 1                             | Mdp1              | 0,3059        |
| Melanoma inhibitory activity protein 3                        | Kiaa0268          | 0,2035        |
| F-actin-binding protein                                       | Nexn              | 0,1319        |
| Beta-I spectrin                                               | Spnb1             | 0,3415        |
| Myomesin family member 1                                      | Myom1             | 0,0247        |
| Acylglycerol kinase, mitochondrial                            | Agk               | 0,6381        |
| NHL repeat-containing protein 2                               | Nhlrc2            | 0,0087        |
| La autoantigen homolog                                        | Ssb               | 0,3466        |
| Caldesmon 1                                                   | Cald1             | 0,3451        |
| 1,4-alpha-glucan-branching enzyme                             | Gbe1              | 0,2482        |
| Nebulin-related-anchoring protein                             | Nrap              | 0,5140        |
| Dystrophin                                                    | Dmd               | 0,2741        |
| Nuclear protein localization protein 4 homolog                | Kiaa1499          | 0,2031        |
| <b>Amyloid beta precursor protein-binding protein 1</b>       | <b>Appbp1</b>     | 0,0159        |
| <b>Glyceraldehyde-3-phosphate dehydrogenase</b>               | <b>Gapd</b>       | 0,0468        |
| 2-methyl branched chain acyl-CoA dehydrogenase                | Acadsb            | 0,1400        |
| [Acyl-carrier-protein] malonyltransferase                     | Mcat              | 0,0227        |
| NEDD8 carrier protein                                         | Ubc12             | 0,4259        |
| <b>Heat shock 70 kDa protein 8</b>                            | <b>Hsc70</b>      | 0,5785        |
| Aortic preferentially expressed protein 1                     | Apeg1             | 0,5401        |
| Alpha-soluble NSF attachment protein                          | Napa              | 0,0251        |
| Activated protein C-binding protein                           | Apoh              | 0,1992        |



|                                                    |             |        |
|----------------------------------------------------|-------------|--------|
| [Acyl-carrier-protein] S-acetyltransferase         | Fasn        | 0,0929 |
| Putative uncharacterized protein;MKIAA0899 protein | Ap2a2       | 0,0801 |
| Glycerol-3-phosphate dehydrogenase 1-like protein  | Gpd1l       | 0,2985 |
| <b>Microtubule-associated protein tau</b>          | <b>Mapt</b> | 0,3424 |
| Protein TBRG4                                      | Kiaa0948    | 0,0248 |
| Elongin 18 kDa subunit                             | Tceb2       | 0,2589 |

**Supplementary Table 3.** Protein concentration up in Atrogin-1 KO mice.

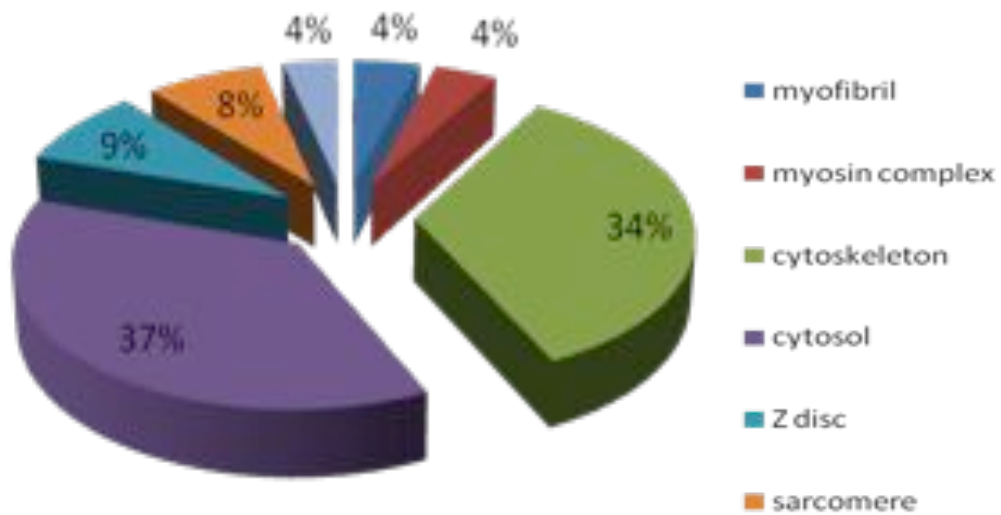

**Supplementary Table 4.** SILAC-based proteomics showed anomalous accumulation of proteins from different cellular compartments in adult Atrogin-1 KO hearts.

| <b>Antibody</b>                             | <b>Customer</b>     | <b>Dilution</b> | <b>Analysis</b> |
|---------------------------------------------|---------------------|-----------------|-----------------|
| mouse anti- $\alpha$ -actinin               | Sigma               | 1:500           | IF              |
| rabbit anti-total Akt                       | Cell Signaling      | 1:1000          | WB              |
| rabbit anti-P-Akt (Ser473)                  | Cell Signaling      | 1:500           | WB              |
| rabbit anti-P-A.C.C                         | Cell Signaling      | 1:1000          | WB              |
| rabbit anti-Atrial Natriuretic Factor (ANF) | Peninsula Lab.      | 1:500           | IF              |
| rabbit anti-beclin                          | Santa Cruz          | 1:1000          | WB              |
| mouse anti-BIP                              | BD                  | 1:1000          | WB              |
| rabbit anti-Bnip3                           | Sigma (clone Ana40) | 1:3000          | WB              |
| rabbit anti-CHMP2B                          | Abcam               | 1:200/1:1000    | IF/WB           |
| rabbit anti-collagen I                      | Acris               | 1:800           | IF              |
| rabbit anti-collagen VI                     | Santa Cruz          | 1:1000          | WB              |
| rabbit anti-collagen VI                     | (1)                 | 1:500           | IF              |
| rabbit anti-dystrophin                      | Abcam               | 1:600           | IF              |
| rabbit anti-anti-eiF2 $\alpha$              | Abcam               | 1:1000          | WB              |
| rabbit anti-anti-P-eiF2 $\alpha$            | Abcam               | 1:1000          | WB              |
| mouse anti-Flag                             | Sigma               | 1:100/1:1000    | IP/WB           |
| rabbit anti-P-Ikb                           | Biosource           | 1:1500          | WB              |
| FITC-isolectine B4                          | Vector              | 1:200           | IF              |
| rat anti-LAMP2a                             | Abcam               | 1:500           | IF              |
| rabbit anti-LAMP2                           | Abcam               | 1:1000          | WB              |
| rabbit anti-LC3                             | Cell Signaling      | 1:200/1:1000    | IF/WB           |
| mouse anti- $\beta$ -MHC                    | (2)                 | 1:50/1:1000     | IF/WB           |
| rabbit anti Myc-tag                         | Cell Signaling      | 1:1000          | WB              |
| guinea pig anti-P62                         | New England Biolabs | 1:200/1:1000    | IF/WB           |
| rabbit anti-RSK2                            | Cell Signaling      | 1:50/1:1000     | IF/WB           |
| rabbit anti-total S6                        | Cell Signaling      | 1:1000          | WB              |
| rabbit anti-P-S6                            | Cell Signaling      | 1:1000          | IF              |
| rabbit anti-skeletal actin                  | Abcam               | 1:100/1:1000    | IF/WB           |
| FITC-anti-Smooth Muscle Actin (SMA)         | Sigma (clone 1A4)   | 1:1500          | IF              |
| rabbit anti-TAU                             | Accu-Specs          | 1:100/1:1000    | IF/WB           |
| mouse anti-Troponin I                       | (3)                 | 1:200           | IF              |
| mouse anti- $\beta$ -tubulin                | Sigma               | 1:1000          | WB              |
| mouse anti ubiquitin                        | Enzo Life Sciences  | 1:100/1:1000    | IP/WB           |

**Supplementary Table 5.** Primary antibodies used in this study.

1. Colombatti, A., Bonaldo, P., and Bucciotti, F. 1992. Stable expression of chicken type-VI collagen alpha 1, alpha 2 and alpha 3 cDNAs in murine NIH/3T3 cells. *Eur J Biochem* 209:785-792.
2. Wessels, A., Vermeulen, J.L., Viragh, S., Kalman, F., Lamers, W.H., and Moorman, A.F. 1991. Spatial distribution of "tissue-specific" antigens in the developing human heart and skeletal muscle. II. An immunohistochemical analysis of myosin heavy chain isoform expression patterns in the embryonic heart. *Anat Rec* 229:355-368.
3. Saggin, L., Gorza, L., Ausoni, S., and Schiaffino, S. 1989. Troponin I switching in the developing heart. *J Biol Chem* 264:16299-16302.

| <b>Gene</b>    | <b>Forward Primer (5'-3')</b> | <b>Reverse Primer (5'-3')</b> |
|----------------|-------------------------------|-------------------------------|
| Atrogin1/MAFbx | GCA AACACTGCCACATTCTCTC       | CTTGAGGGGAAAGTGAGACG          |
| ATF4           | TCCTGAACAGCGAAGTGTTG          | ACCCATGAGGTTTCAAGTGC          |
| CHOP           | GCTGGAAGCCTGGTATGAG           | ATGTGCGTGTGACCTCTGTT          |
| GADD34         | AGAGAAGACCAAGGGACGTG          | CAGCAAGGAATGGACTGTG           |
| GAPDH          | CACCATCTTCCAGGAGCGAG          | CCTTCTCCATGGTGGTGAAGAC        |

**Supplementary Table 6.** Primers used in RTqPCR analyses.
